# Supplementary material for: Two Cases of Vancomycin-Resistant Enterococcus faecium Bacteremia With Development of Daptomycin-Resistant Phenotype and its Detection Using Oxford Nanopore Sequencing
Source: PubMed Central journal article supplement — Open Forum Infect Dis. 2020 May 23;7(6):ofaa180. doi: 10.1093/ofid/ofaa180 (PMC7291683; doi:10.1093/ofid/ofaa180), 2020-05-23
Supplement: ofaa180_suppl_supplementary_material.pdf [file ofaa180_suppl_supplementary_material.pdf]

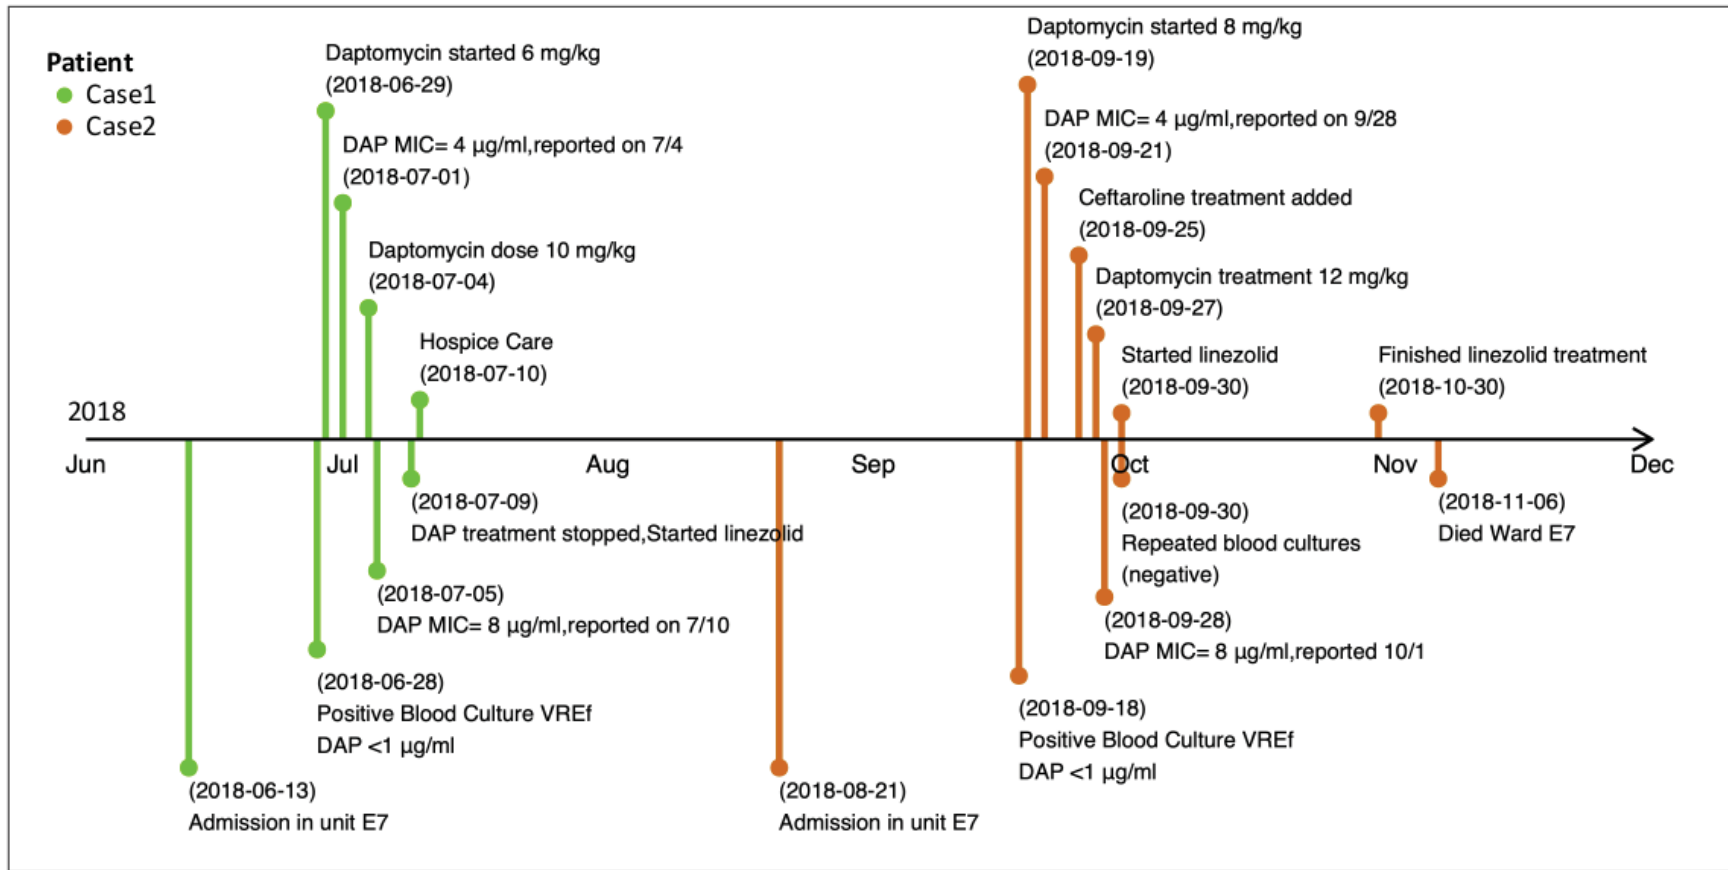

**Supplementary Figure 1. Case report timeline.** Main clinical events related to the development of a DAP non-susceptible phenotype are represented. Green colored lines correspond to patient 1 and brown to patient 2. Length of the bars were adjusted in order to address readability of the event's labels

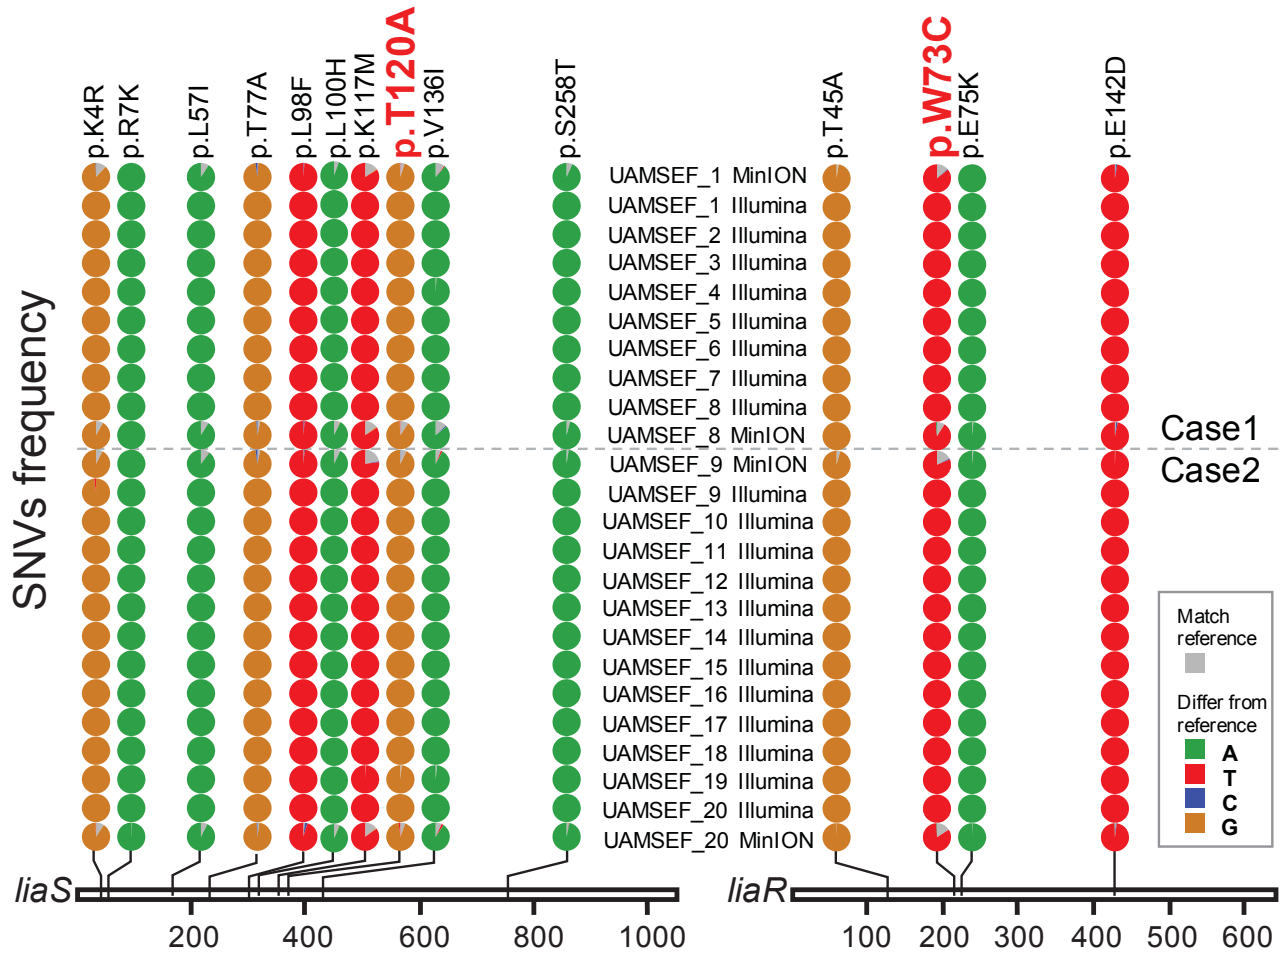

**Supplementary Figure 2. Visualization of SNVs frequency on *liaS* (left panel) and *liaR* (right panel) genes from case 1 and 2.** Lollipop (pie chart) plot of SNVs frequency of missense variants found on *liaS* and *liaR* genes on the 20 sequenced isolates. The base frequency at each locus represent as a gray color in pie chart. If a nucleotide differs from the reference sequence, the pie chart was colored in proportion to the frequency of each base (A=green, C=blue, T=red, G=brown). Variants found are ordered from top (UAMSEF\_1) to bottom (UAMSEF\_20). The most common mutations in the DAP resistant phenotype (LiaST120A and LiaRW73C) are labeled in red color.



|                   |   |          |       |       |       |       |       |       |       |       |       |       |       |      |       |      |  |
|-------------------|---|----------|-------|-------|-------|-------|-------|-------|-------|-------|-------|-------|-------|------|-------|------|--|
| <i>E. faecium</i> |   |          |       |       |       |       |       |       |       |       |       |       |       |      |       |      |  |
| UAMSEF_19         | 2 | Illumina | 1     | 1     | 1     | 1     | 1     | 1     | 0.993 | 0.985 | 0.985 | 1     | 1     | 1    | 1     | 1    |  |
| <i>E. faecium</i> |   |          |       |       |       |       |       |       |       |       |       |       |       |      |       |      |  |
| UAMSEF_20         | 2 | Illumina | 1     | 1     | 1     | 1     | 1     | 1     | 1     | 1     | 1     | 1     | 1     | 1    | 1     | 1    |  |
| <i>E. faecium</i> |   |          |       |       |       |       |       |       |       |       |       |       |       |      |       |      |  |
| UAMSEF 20         | 2 | MinION   | 0.905 | 0.996 | 0.926 | 0.978 | 0.981 | 0.939 | 0.855 | 0.942 | 0.929 | 0.977 | 0.995 | 0.84 | 0.994 | 0.99 |  |

---
